# Supplementary material for: Variations in Mediterranean–Atlantic exchange across the late Pliocene climate transition
Source: Copernicus journal article supplement (doi:10.5194/cp-14-339-2018), 2018-03-09
Supplement: Supplementary file 1 [file cp-14-339-2018-supplement.zip]

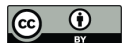

## *Supplement of*

# **Variations in Mediterranean–Atlantic exchange across the late Pliocene climate transition**

Ángela García-Gallardo et al.

*Correspondence to:* Ángela García-Gallardo ([angela.garcia-gallardo@uni-graz.at](mailto:angela.garcia-gallardo@uni-graz.at))

- [cp-14-339-2018-supplement-title-page.pdf](#)
- [Supplementary Table 1\\_revised.xlsx](#)
- [Supplementary Table 2\\_revised.xlsx](#)

The copyright of individual parts of the supplement might differ from the CC BY 4.0 License.
