# Supplementary material for: Variations in Mediterranean–Atlantic exchange across the late Pliocene climate transition
Source: Copernicus journal article supplement (doi:10.5194/cp-14-339-2018), 2018-03-09
Supplement: Supplementary file 1 [file cp-14-339-2018-supplement.zip]

## Sheet: Suppl. Table 1
SUPPLEMENTARY TABLE 1
18O values of IODP Hole U1389E and ODP Hole 978A from 3.33 to 2.60 Myrs. Intervals I, II and III are indicated.
	IODP Hole U1389E										ODP Hole 978A
		Expedition	Site	Hole	Core-Section	Interval	Depth (mbsf-CSF)	Age (Ma)	d18O (‰ VPDB)			Expedition	Site	Hole	Core-Section	Interval	Depth (mbsf)	Age (Ma)	d18O (‰ VPDB)
	Interval III (2.73-2.60 Myrs)	339	U1389	E	41R-2	77–79	705.87	2.59749	0.01		Interval III (2.73-2.60 Myrs)	161	978	A	17R-1	38-40	342.58	2.59865	-0.18511
		339	U1389	E	41R-2	102–104	706.12	2.59887	0.15			161	978	A	17R-1	88-90	343.08	2.60074	-0.16907
		339	U1389	E	41R-3	0–2	706.6	2.60151	-0.11			161	978	A	17R-1	138-140	343.58	2.60283	-0.964336
		339	U1389	E	41R-3	25–27	706.85	2.60288	0.19			161	978	A	17R-2	38-40	344.08	2.60491	0.150859
		339	U1389	E	41R-3	50–52	707.1	2.60425	0.49			161	978	A	17R-2	88-90	344.58	2.607	0.539463
		339	U1389	E	41R-3	75–77	707.35	2.60563	-0.15			161	978	A	17R-2	138-140	345.08	2.60933	0.36268
		339	U1389	E	41R-3	100–102	707.6	2.607	0.7			161	978	A	17R-3	38-40	345.58	2.61167	0.314729
		339	U1389	E	41R-4	35–37	708.45	2.60773	0.11			161	978	A	17R-3	88-90	346.08	2.614	-0.481373
		339	U1389	E	41R-4	50–52	708.6	2.60786	-0.14			161	978	A	17R-3	138-140	346.58	2.6176	0.37
		339	U1389	E	41R-4	75–77	708.85	2.60807	-0.22			161	978	A	17R-4	38-40	347.08	2.6212	0.241217
		339	U1389	E	42R-1	0–2	713.1	2.61171	-0.22			161	978	A	17R-4	88-90	347.58	2.6248	0.346543
		339	U1389	E	42R-1	61–63	713.71	2.61224	0			161	978	A	17R-4	138-140	348.08	2.6284	-0.059885
		339	U1389	E	42R-1	75–77	713.85	2.61236	-0.38			161	978	A	17R-5	38-40	348.58	2.632	-1.03327
		339	U1389	E	42R-1	125–127	714.35	2.61279	-0.34			161	978	A	17R-5	88-90	349.08	2.634	-0.207444
		339	U1389	E	42R-2	0–2	714.6	2.613	-0.65			161	978	A	17R-5	138-140	349.58	2.636	0.291481
		339	U1389	E	42R-2	25–27	714.85	2.61454	-0.15			161	978	A	17R-6	38-40	350.08	2.642	-0.203211
		339	U1389	E	42R-2	50–52	715.1	2.61609	-0.54			161	978	A	17R-6	88-90	350.58	2.648	-0.443492
		339	U1389	E	42R-2	100–102	715.6	2.61917	-0.16			161	978	A	17R-6	138-140	351.08	2.654	-0.923257
		339	U1389	E	42R-3	12–14	716.22	2.623	0.37			161	978	A	17R-7	38-40	351.58	2.65991	-0.695553
		339	U1389	E	42R-3	50–52	716.6	2.62322	0.21			161	978	A	18R-1	38-40	352.18	2.667	0.321716
		339	U1389	E	42R-3	100–102	717.1	2.62352	0.29			161	978	A	18R-1	88-90	352.68	2.671	0.289238
		339	U1389	E	42R-4	2–4	717.62	2.62383	0.3			161	978	A	18R-1	138-140	353.18	2.675	-0.714218
		339	U1389	E	42R-5	25–27	719.28	2.6248	0.3			161	978	A	18R-2	38-40	353.68	2.679	-1.1075
		339	U1389	E	42R-5	50–52	719.53	2.62495	0.22			161	978	A	18R-2	88-90	354.18	2.67988	-0.222137
		339	U1389	E	43R-1	29–31	722.99	2.62699	-0.09			161	978	A	18R-2	138-140	354.68	2.68075	-0.247309
		339	U1389	E	43R-1	73–75	723.43	2.62725	0.366558			161	978	A	18R-3	38-40	355.18	2.68162	-0.67761
		339	U1389	E	43R-2	0–2	724.2	2.62771	-0.18			161	978	A	18R-3	88-90	355.68	2.6825	-0.705749
		339	U1389	E	43R-2	50–52	724.7	2.628	0.27355			161	978	A	18R-3	138-140	356.18	2.68337	-0.148212
		339	U1389	E	43R-2	100–102	725.2	2.63	0.0875336			161	978	A	18R-4	38-40	356.68	2.68425	-0.108227
		339	U1389	E	43R-3	0–2	-1	2.632	-0.55			161	978	A	18R-4	88-90	357.18	2.68513	-0.197937
		339	U1389	E	43R-3	100–102	726.7	2.636	0.347556			161	978	A	18R-4	138-140	357.68	2.686	0.168917
		339	U1389	E	43R-4	0–2	727.2	2.63852	-0.06			161	978	A	18R-5	38-40	358.18	2.6945	0.0327836
		339	U1389	E	43R-4	50–52	727.7	2.64104	0.202544			161	978	A	18R-5	88-90	358.68	2.703	-0.595422
		339	U1389	E	43R-4	100–102	728.2	2.64355	0.167541			161	978	A	18R-5	138-140	359.18	2.7045	-0.0973213
		339	U1389	E	43R-5	3–5	728.73	2.64622	0.01			161	978	A	18R-6	38-40	359.68	2.706	-0.49366
		339	U1389	E	43R-5	78–80	729.48	2.65	-0.444513			161	978	A	18R-6	88-90	360.18	2.70792	0.434688
		339	U1389	E	44R-1	0–2	732.3	2.65259	-0.34			161	978	A	18R-6	138-140	360.68	2.70985	-0.191024
		339	U1389	E	44R-1	50–52	732.8	2.65305	-0.14			161	978	A	19R-1	88-90	362.28	2.716	0.245188
		339	U1389	E	44R-1	100–102	733.3	2.6535	-0.53			161	978	A	19R-1	138-140	362.78	2.7215	-0.26307
		339	U1389	E	44R-2	0–2	733.84	2.654	0.29			161	978	A	19R-2	38-40	363.28	2.727	-0.657825
		339	U1389	E	44R-2	50–52	734.34	2.65671	-0.85			161	978	A	19R-2	88-90	363.78	2.7288	-0.667948
		339	U1389	E	44R-2	100–102	734.84	2.65942	-0.28			161	978	A	19R-3	38-40	364.78	2.7324	0.218271
		339	U1389	E	44R-3	90–92	736.24	2.667	0.39			161	978	A	19R-3	88-90	365.28	2.7342	-0.0772292
		339	U1389	E	44R-4	30–32	737.14	2.66838	-0.04			161	978	A	19R-4	38-40	366.28	2.7378	-0.665575
		339	U1389	E	45R-1	23–25	742.13	2.676	-0.57			161	978	A	19R-4	138-140	367.28	2.7414	-0.0831433
		339	U1389	E	45R-1	50–52	742.4	2.67671	-0.44			161	978	A	19R-5	88-90	368.28	2.745	-0.773251
		339	U1389	E	45R-1	75–77	742.65	2.67738	-0.17			161	978	A	20R-2	0-2.5	372.5	2.756	0.383
		339	U1389	E	45R-1	100–102	742.9	2.67804	-0.41			161	978	A	20R-2	20-21.5	372.7	2.76	0.243
		339	U1389	E	45R-1	125–127	743.15	2.6787	-0.04			161	978	A	20R-2	40-41.5	372.9	2.764	-0.6255
		339	U1389	E	45R-2	0–2	743.4	2.67936	-0.62			161	978	A	20R-2	60-61.5	373.1	2.769	-0.315
		339	U1389	E	45R-2	25–27	743.65	2.68002	0.33			161	978	A	20R-2	80-81.5	373.3	2.779	-1.12851
		339	U1389	E	45R-2	50–52	743.9	2.68068	-0.34			161	978	A	20R-2	100-101.5	373.5	2.789	-1.3175
		339	U1389	E	45R-2	73–75	744.13	2.68129	-0.27			161	978	A	20R-2	120-122	373.7	2.79146	-1.07239
		339	U1389	E	45R-2	100–102	744.4	2.68201	-0.28			161	978	A	20R-2	140-141.5	373.9	2.79392	-0.453
		339	U1389	E	45R-2	125–127	744.65	2.68267	-0.22			161	978	A	20R-3	0-2	374	2.79515	-0.359
		339	U1389	E	45R-3	0–2	744.91	2.68335	-0.06			161	978	A	20R-3	22-23.5	374.22	2.79786	-0.227
		339	U1389	E	45R-3	50–52	745.41	2.68468	-0.2			161	978	A	20R-3	40-41.5	374.4	2.80008	-0.118
		339	U1389	E	45R-3	100–102	745.91	2.686	0.37			161	978	A	20R-3	60-62	374.6	2.80254	-0.179
		339	U1389	E	45R-4	50–52	746.91	2.68928	0.38			161	978	A	20R-3	80-82	374.8	2.805	0.27155
		339	U1389	E	45R-4	98–100	747.39	2.69022	-0.01			161	978	A	20R-3	100-101.5	375	2.80929	0.274
		339	U1389	E	45R-5	2–4	747.93	2.69128	0.55			161	978	A	20R-3	120-122	375.2	2.81357	-0.1619
		339	U1389	E	45R-5	50–52	748.41	2.69222	-0.02			161	978	A	20R-4	0-2	375.5	2.82	-0.402
		339	U1389	E	45R-5	125–127	749.16	2.69369	0.152539			161	978	A	20R-4	20-22	375.7	2.828	-1.23021
		339	U1389	E	45R-6	0–2	749.41	2.69418	0.36			161	978	A	20R-4	40-41.5	375.9	2.83045	-0.88
		339	U1389	E	45R-6	100–102	750.41	2.69614	0.03			161	978	A	20R-4	60-62	376.1	2.8329	-1.25179
		339	U1389	E	45R-7	0–2	750.72	2.69675	0.28			161	978	A	20R-4	80-81.5	376.3	2.83535	-0.61
		339	U1389	E	45R-7	50–52	751.22	2.69773	-0.09			161	978	A	20R-4	98-99.5	376.48	2.83755	-0.24084
		339	U1389	E	46R-1	4–6	751.54	2.69922	-0.19			161	978	A	20R-4	118-119.5	376.68	2.84	0.055
		339	U1389	E	46R-1	50–52	752	2.70017	-0.4			161	978	A	20R-5	0-2	377	2.848	-1.118
		339	U1389	E	46R-1	100–102	752.5	2.70111	-0.14			161	978	A	20R-5	21-23	377.21	2.8501	-0.34789
		339	U1389	E	46R-2	0–2	753	2.70205	0.12			161	978	A	20R-5	40-41.5	377.4	2.852	-0.277
		339	U1389	E	46R-2	50–52	753.5	2.703	-0.35			161	978	A	20R-5	60-61.5	377.6	2.854	0.677
		339	U1389	E	46R-2	100–102	754	2.70594	-0.09			161	978	A	20R-5	80-81.5	377.8	2.862	-0.329
		339	U1389	E	46R-3	50–52	755.04	2.70735	-0.4			161	978	A	20R-5	100-101.5	378	2.87	-1.04177
		339	U1389	E	46R-3	100–102	755.54	2.70877	0.42		Interval II (3.02-2.88 Myrs)	161	978	A	20R-5	120-122	378.2	2.878	-1.275
		339	U1389	E	46R-4	0–2	756.04	2.71018	-0.474164			161	978	A	20R-5	140-141.5	378.4	2.88171	-0.583
		339	U1389	E	46R-4	50–52	756.54	2.7116	-0.08			161	978	A	20R-6	0-2	378.5	2.88357	0.348
		339	U1389	E	46R-4	100–102	757.04	2.71309	0.47			161	978	A	20R-6	20-22	378.7	2.88729	0.21412
		339	U1389	E	46R-5	3–5	757.57	2.71442	-0.22			161	978	A	20R-6	40-41.5	378.9	2.891	0.261
		339	U1389	E	46R-5	50–52	758.04	2.71535	0.06			161	978	A	20R-6	60-61.5	379.1	2.89264	0.388
		339	U1389	E	46R-5	100–102	758.54	2.71594	-0.12			161	978	A	20R-6	80-81.5	379.3	2.89427	0.202
		339	U1389	E	46R-6	0–2	759.04	2.71652	0.04			161	978	A	20R-6	100-101.5	379.5	2.89591	0.026
		339	U1389	E	46R-6	50–52	759.54	2.71715	0.28			161	978	A	20R-6	120-122	379.7	2.89755	-0.077
		339	U1389	E	46R-6	103–105	760.07	2.7177	0.21			161	978	A	20R-6	140-141.5	379.9	2.89918	-0.9088
		339	U1389	E	46R-7	0–2	760.54	2.71829	-0.148195			161	978	A	20R-CC	0-2	380	2.9	-1.21244
		339	U1389	E	46R-7	50–52	761.04	2.71878	0.13			161	978	A	21R-1	0-2	380.6	2.921	-1.363
		339	U1389	E	47R-1	0–2	761.1	2.71939	-0.25			161	978	A	21R-1	20-21.5	380.8	2.923	-0.743
		339	U1389	E	47R-1	50–52	761.6	2.72	-0.31			161	978	A	21R-1	40-41.5	381	2.925	-0.254
		339	U1389	E	47R-1	100–102	762.1	2.72252	0.38			161	978	A	21R-1	60-61.5	381.2	2.927	-0.25
		339	U1389	E	47R-2	4–6	762.64	2.72467	-0.112484			161	978	A	21R-1	80-81.5	381.4	2.93425	0.06
		339	U1389	E	47R-2	50–52	763.1	2.727	-0.493517			161	978	A	21R-1	100-101.5	381.6	2.9415	-0.786
		339	U1389	E	47R-2	100–102	763.6	2.7285	-0.18149			161	978	A	21R-1	120-121.5	381.8	2.94875	-0.573
		339	U1389	E	47R-3	25–27	763.96	2.72955	-0.0600802			161	978	A	21R-1	140-142	382	2.956	-0.201
		339	U1389	E	47R-3	50–52	764.21	2.75682	0.71			161	978	A	21R-2	0-2	382.1	2.95727	-0.411
		339	U1389	E	48R-1	4–6	770.74	2.75978	-0.41151			161	978	A	21R-2	20-22	382.3	2.95981	-1.061
		339	U1389	E	48R-1	75–77	771.45	2.7607	-0.53709			161	978	A	21R-2	40-41.5	382.5	2.96235	-1.466
		339	U1389	E	48R-1	97–99	771.67	2.76082	-0.07			161	978	A	21R-2	60-61.5	382.7	2.96488	-1.636
		339	U1389	E	48R-2	0–2	771.7	2.76275	-0.375507			161	978	A	21R-2	80-81.5	382.9	2.96742	-1.176
		339	U1389	E	48R-2	46–48	772.16	2.79686	0.24			161	978	A	21R-2	102-103.5	383.12	2.97022	-0.217
		339	U1389	E	49R-1	3–5	780.33	2.80091	0.257926			161	978	A	21R-2	120-122	383.3	2.9725	-0.153
		339	U1389	E	49R-1	100–102	781.3	2.803	0.43			161	978	A	21R-2	140-141.5	383.5	2.97504	-0.304
		339	U1389	E	49R-2	0–2	781.8	2.80509	-0.429512			161	978	A	21R-3	0-2	383.6	2.97631	-0.351
		339	U1389	E	49R-2	50–52	782.3	2.80634	-0.129082			161	978	A	21R-3	21-22.5	383.81	2.97897	-0.493
		339	U1389	E	49R-2	80–82	782.6	2.80718	0			161	978	A	21R-3	40-41.5	384	2.98138	-1.085
		339	U1389	E	49R-3	0–2	782.8	2.81031	-0.814545			161	978	A	21R-3	60-61.5	384.2	2.98392	-0.422
		339	U1389	E	49R-3	78–80	783.55	2.8382	-0.322086			161	978	A	21R-3	80-81.5	384.4	2.98646	-0.884
		339	U1389	E	50R-1	33–35	790.23	2.83891	-0.100483			161	978	A	21R-3	100-101.5	384.6	2.989	-1.046
		339	U1389	E	50R-1	50–52	790.4	2.83996	-0.410088			161	978	A	21R-3	121-122.5	384.81	2.99236	-0.939
	Interval II (3.02-2.88 Myrs)	339	U1389	E	50R-1	75–77	790.65	2.87691	0.18			161	978	A	21R-3	140-141.5	385	2.9954	-0.447
		339	U1389	E	51R-1	0–2	799.5	2.87892	-0.24			161	978	A	21R-4	0-2	385.1	2.997	-0.138
		339	U1389	E	51R-1	50–52	800	2.88165	0.173541			161	978	A	21R-4	20-22	385.3	2.999	-0.941
		339	U1389	E	51R-1	73–75	800.23	2.88507	0			161	978	A	21R-4	40-41.5	385.5	3.001	-0.088
		339	U1389	E	51R-1	100–102	800.5	2.88823	0.0305286			161	978	A	21R-4	60-61.5	385.7	3.003	0.501
		339	U1389	E	51R-1	125–127	800.75	2.89102	0.14			161	978	A	21R-4	82-83.5	385.92	3.0052	0.154
		339	U1389	E	51R-2	0–2	800.97	2.89419	-0.0804812			161	978	A	21R-4	100-101.5	386.1	3.007	0.1
		339	U1389	E	51R-2	25–27	801.22	2.89735	-0.1			161	978	A	21R-4	120-122	386.3	3.009	-0.427
		339	U1389	E	51R-2	50–52	801.47	2.89976	-0.0934823			161	978	A	21R-4	140-141.5	386.5	3.011	-1.011
		339	U1389	E	51R-2	69–71	801.66	2.90368	-0.6			161	978	A	21R-5	0-2	386.6	3.012	-0.736
		339	U1389	E	51R-2	100–102	801.97	2.91002	-0.79			161	978	A	21R-5	20-22	386.8	3.016	-1.196
		339	U1389	E	51R-3	0–2	802.47	2.91335	-0.71			161	978	A	21R-5	40-41.5	387	3.024	-0.534
		339	U1389	E	51R-3	25–27	802.72	2.92002	-0.664532			161	978	A	21R-5	60-61.5	387.2	3.0268	-0.644
		339	U1389	E	51R-3	75–77	803.22	2.92335	-0.34			161	978	A	21R-5	80-81.5	387.4	3.0296	-0.57906
		339	U1389	E	51R-3	100–102	803.47	2.92668	0.304553			161	978	A	21R-5	100-101.5	387.6	3.0324	-0.268
		339	U1389	E	51R-3	125–127	803.72	2.93001	0.45			161	978	A	21R-5	120-121.5	387.8	3.0352	-0.109
		339	U1389	E	51R-4	0–2	803.97	2.93426	0.29			161	978	A	21R-5	140-141.5	388	3.038	-0.152
		339	U1389	E	51R-4	50–52	804.47	2.93622	0.26			161	978	A	21R-6	0-2	388.1	3.04002	0.186
		339	U1389	E	51R-4	73–75	804.7	2.93851	-0.4			161	978	A	21R-6	20-22	388.3	3.04406	0.34613
		339	U1389	E	51R-4	100–102	804.97	2.94064	-0.0404777			161	978	A	21R-6	40-41.5	388.5	3.0481	0.241
		339	U1389	E	51R-4	125–127	805.22	2.94276	-0.12			161	978	A	21R-6	60-61.5	388.7	3.05214	-0.125
		339	U1389	E	51R-5	0–2	805.47	2.94489	-0.485517			161	978	A	21R-6	80-81.5	388.9	3.05618	-0.505
		339	U1389	E	51R-5	25–27	805.72	2.94701	0.98			161	978	A	21R-CC	0-2	388.99	3.058	-1.24
		339	U1389	E	51R-5	50–52	805.97	2.94939	-0.422511			161	978	A	21R-CC	19-20.5	389.18	3.06019	-0.224
		339	U1389	E	51R-5	100–102	806.47	2.9521	-0.41			161	978	A	22R-1	0-2	390.2	3.07193	-0.327
		339	U1389	E	51R-6	7–9	807.04	2.95415	-0.44			161	978	A	22R-1	18-20	390.38	3.074	-0.574
		339	U1389	E	51R-6	50–52	807.47	2.95653	-0.99			161	978	A	22R-1	40-41.5	390.6	3.0811	-0.031
		339	U1389	E	51R-6	100–102	807.97	2.95891	-0.288182			161	978	A	22R-1	60-61.5	390.8	3.08755	0.033
		339	U1389	E	51R-7	0–2	808.47	2.96129	-0.52			161	978	A	22R-1	80-81.5	391	3.094	0.2622
		339	U1389	E	51R-7	50–52	808.97	2.96214	-0.77			161	978	A	22R-1	100-101.5	391.2	3.09667	0.0362
		339	U1389	E	51R-7	68–70	809.15	2.96502	-0.94			161	978	A	22R-1	120-122	391.4	3.09933	-0.485
		339	U1389	E	52R-1	25–27	809.35	2.96521	-0.486163			161	978	A	22R-1	140-141.5	391.6	3.102	-1.67
		339	U1389	E	52R-2	0–2	809.37	2.96759	0.0755325			161	978	A	22R-2	0-2	391.7	3.10315	-1.13763
		339	U1389	E	52R-2	25–27	809.62	2.96996	0.36			161	978	A	22R-2	19.5-21	391.895	3.1054	-1.2265
		339	U1389	E	52R-2	50–52	809.87	2.97073	0.0145272			161	978	A	22R-2	40-41.5	392.1	3.10777	-1.26117
		339	U1389	E	52R-2	72–74	810.09	2.97167	0.0275283			161	978	A	22R-2	60-61.5	392.3	3.11008	-0.38797
		339	U1389	E	52R-2	100–102	810.37	2.97251	0.64			161	978	A	22R-2	80-81.5	392.5	3.11238	-0.151
		339	U1389	E	52R-2	125–127	810.62	2.97336	-0.2			161	978	A	22R-2	100-101.5	392.7	3.11469	-0.34
		339	U1389	E	52R-3	0–2	810.87	2.97504	0.57			161	978	A	22R-2	120-122	392.9	3.117	-0.01738
		339	U1389	E	52R-3	50–52	811.37	2.97588	0.242926			161	978	A	22R-2	140-141.5	393.1	3.1218	-0.24
		339	U1389	E	52R-3	75–77	811.62	2.97672	0.13			161	978	A	22R-3	2.5-4	393.225	3.1248	-0.25
		339	U1389	E	52R-3	100–102	811.87	2.97757	0.22			161	978	A	22R-3	20-21.5	393.4	3.13233	-0.5
		339	U1389	E	52R-3	125–127	812.12	2.97841	-0.18			161	978	A	22R-3	40-41.5	393.6	3.134	-1.811
		339	U1389	E	52R-4	0–2	812.37	2.97925	-0.220084			161	978	A	22R-3	60-61.5	393.8	3.136	-0.136
		339	U1389	E	52R-4	25–27	812.62	2.98262	-0.202083			161	978	A	22R-3	80-81.5	394	3.138	-0.087
		339	U1389	E	52R-4	125–127	813.62	2.98431	0.535932			161	978	A	22R-3	100-101.5	394.2	3.14	0.234
		339	U1389	E	52R-5	25–27	814.12	2.98599	-0.47			161	978	A	22R-3	120-122	394.4	3.141	0.157
		339	U1389	E	52R-5	75–77	814.62	2.98778	-0.4			161	978	A	22R-3	140-141.5	394.6	3.14243	0.105
		339	U1389	E	52R-5	100–102	814.87	2.98958	-0.416088			161	978	A	22R-4	0-2	394.7	3.14386	0.156
		339	U1389	E	52R-5	125–127	815.12	2.9916	-0.02			161	978	A	22R-4	20-21.5	394.9	3.14529	-0.001
		339	U1389	E	52R-6	0–2	815.4	2.9934	-0.413088			161	978	A	22R-4	40-41.5	395.1	3.14671	-0.449
		339	U1389	E	52R-6	25–27	815.65	2.9952	0.01			161	978	A	22R-4	60-61.5	395.3	3.14814	-0.635
		339	U1389	E	52R-6	50–52	815.9	2.997	-0.722094			161	978	A	22R-4	120-122	395.9	3.14957	-0.424
		339	U1389	E	52R-6	75–77	816.15	2.9972	-0.13			161	978	A	22R-4	140-141.5	396.1	3.151	-1.013
		339	U1389	E	52R-7	0–2	816.18	2.99892	-0.635092			161	978	A	22R-5	3-4.5	396.23	3.15268	-0.822
		339	U1389	E	52R-7	25–27	816.43	3.00139	-0.22			161	978	A	22R-5	20-21.5	396.4	3.15487	-0.449
		339	U1389	E	52R-8	0–2	816.79	3.0031	-0.197083			161	978	A	22R-5	40-41.5	396.6	3.15746	-0.186
		339	U1389	E	52R-8	25–27	817.04	3.005	0.45			161	978	A	22R-5	60-61.5	396.8	3.16004	-0.896
		339	U1389	E	52R-9	3–5	817.32	3.00533	-0.273085			161	978	A	22R-5	80-81.5	397	3.16262	-0.243
		339	U1389	E	52R-9	25–27	817.54	3.00606	-0.130082			161	978	A	22R-5	100-101.5	397.2	3.16521	-0.576
		339	U1389	E	52R-9	75–77	818.04	3.00647	-0.11			161	978	A	22R-5	120-122	397.4	3.16779	-0.404
		339	U1389	E	52R-9	103–105	818.32	3.0068	-0.345086			161	978	A	22R-5	140-141.5	397.6	3.17037	-1.086
		339	U1389	E	52R-9	125–127	818.54	3.00748	-0.2			161	978	A	22R-6	0-2	397.7	3.17167	-0.998
		339	U1389	E	53R-1	0–2	818.7	3.00786	-0.390087			161	978	A	22R-6	20-21.5	397.9	3.17942	-0.115
		339	U1389	E	53R-1	25–27	818.95	3.00824	-0.362825			161	978	A	22R-6	40-41.5	398.1	3.182	0.126
		339	U1389	E	53R-1	50–52	819.2	3.00856	-0.111081			161	978	A	22R-6	60-61.5	398.3	3.18345	-0.264
		339	U1389	E	53R-1	71–73	819.41	3.009	-0.629318			161	978	A	22R-6	80-81.5	398.5	3.18491	-0.371
		339	U1389	E	53R-1	100–102	819.7	3.00927	0.13			161	978	A	22R-6	100-101.5	398.7	3.18636	-0.63804
		339	U1389	E	53R-2	0–2	819.72	3.01263	-0.411088			161	978	A	22R-6	120-122	398.9	3.18709	-0.637
		339	U1389	E	53R-2	25–27	819.97	3.016	0.18469			161	978	A	22R-6	140-141.5	399.1	3.18855	-0.94
		339	U1389	E	53R-2	50–52	820.22	3.07269	-0.458089			161	978	A	22R-7	0-2	399.2	3.19	-0.283
		339	U1389	E	54R-1	25–27	828.55	3.07419	-0.493163			161	978	A	22R-7	20-22	399.4	3.1965	-0.485333
		339	U1389	E	54R-2	0–2	828.77	3.07589	-0.238084			161	978	A	22R-7	40-41.5	399.6	3.19813	-0.17009
		339	U1389	E	54R-2	25–27	829.02	3.07759	-0.735139			161	978	A	22R-7	60-61.5	399.8	3.203	0.053
		339	U1389	E	54R-2	50–52	829.27	3.07929	-0.454088			161	978	A	22R-CC	0-2	399.85	3.20337	-0.329
		339	U1389	E	54R-2	75–77	829.52	3.081	-0.348176			161	978	A	23R-1	20-22	400	3.20675	-0.137
		339	U1389	E	54R-2	100–102	829.77	3.0827	-0.313086			161	978	A	22R-CC	17-19	400.02	3.2105	-0.519
		339	U1389	E	54R-2	125–127	830.02	3.13633	-0.065861			161	978	A	23-R-1	40-41.5	400.2	3.21425	-0.935
		339	U1389	E	55R-1	0–2	837.9	3.20282	-0.0248583			161	978	A	23-R-1	60-61.5	400.4	3.218	-1.62
	Interval I (3.33-3.27 Myrs)	339	U1389	E	56R-1	17–19	847.67	3.267	-0.310877			161	978	A	23-R-1	80-81.5	400.6	3.22	-1.09
		339	U1389	E	57R-1	0–2	857.1	3.26884	-0.194564			161	978	A	23-R-1	100-101.5	400.8	3.222	-1.65265
		339	U1389	E	57R-1	50–52	857.6	3.27251	0.167052			161	978	A	23-R-1	120-122	401	3.223	-0.352
		339	U1389	E	57R-2	0–2	858.6	3.27802	0.453173			161	978	A	23-R-1	140-141.5	401.2	3.225	-0.207
		339	U1389	E	57R-3	0–2	860.1	3.28	-0.432548			161	978	A	23R-2	0-2.5	401.3	3.229	-0.141
		339	U1389	E	57R-3	50–52	860.6	3.28199	-0.25456			161	978	A	23R-2	20-22	401.5	3.231	-0.038
		339	U1389	E	57R-3	100–102	861.1	3.28284	0.0501466			161	978	A	23R-2	60-61.5	401.9	3.23471	-0.214
		339	U1389	E	57R-4	0–2	861.63	3.28363	0.0384202			161	978	A	23R-2	80-81.5	402.1	3.23843	-0.491
		339	U1389	E	57R-4	50–52	862.13	3.28442	0.0634185			161	978	A	23R-2	100-101.5	402.3	3.24214	-0.863
		339	U1389	E	57R-4	100–102	862.63	3.28521	0.0361457			161	978	A	23R-2	120-122	402.5	3.244	-0.956
		339	U1389	E	57R-5	0–2	863.13	3.286	0.457392			161	978	A	23R-2	140-141.5	402.7	3.24621	-0.775
		339	U1389	E	57R-5	50–52	863.63	3.288	-0.527542			161	978	A	23R-3	0-2	402.8	3.24842	-0.536
		339	U1389	E	57R-5	100–102	864.13	3.29	-0.403883			161	978	A	23R-3	20-22	403	3.25063	-0.225
		339	U1389	E	57R-6	0–2	864.63	3.29201	0.0150061			161	978	A	23R-3	40-42	403.2	3.25284	-0.357
		339	U1389	E	57R-6	50–52	865.13	3.29401	-0.13796			161	978	A	23R-3	60-61.5	403.4	3.25505	-0.258
		339	U1389	E	57R-6	100–102	865.63	3.29801	-0.597857			161	978	A	23R-3	80-81.5	403.6	3.25726	0.03966
		339	U1389	E	57R-7	50–52	866.63	3.29848	-0.825131			161	978	A	23R-4	0-2	404.3	3.26058	-1.087
		339	U1389	E	58R-1	0–2	866.7	3.29957	-0.690559			161	978	A	23R-4	20-22	404.5	3.26279	-1.356
		339	U1389	E	58R-1	50–52	867.2	3.30072	-0.827131		Interval I (3.33-3.27 Myrs)	161	978	A	23R-4	40-41.5	404.7	3.265	-0.739
		339	U1389	E	58R-1	103–105	867.73	3.30174	-0.605152			161	978	A	23R-4	60-61.5	404.9	3.26882	-0.781
		339	U1389	E	58R-2	0–2	868.2	3.30283	-0.711142			161	978	A	23R-4	80-81.5	405.1	3.27264	0.003
		339	U1389	E	58R-2	50–52	868.7	3.30391	-0.639567			161	978	A	23R-4	100-101.5	405.3	3.27645	-0.007
		339	U1389	E	58R-2	100–102	869.2	3.305	-0.914526			161	978	A	23R-4	120-122	405.5	3.28027	-0.158
		339	U1389	E	58R-3	0–2	869.7	3.311	-0.0962024			161	978	A	23R-4	140-141.5	405.7	3.28409	0.286
		339	U1389	E	58R-3	50–52	870.2	3.3133	-0.115201			161	978	A	23R-5	0-2	405.8	3.286	0.429
		339	U1389	E	58R-3	100–102	870.7	3.318	-1.21709			161	978	A	23R-5	20-22	406	3.298	-0.544
		339	U1389	E	58R-4	50–52	871.72	3.32008	-0.43717			161	978	A	23R-5	40-41.5	406.2	3.29983	-0.325
		339	U1389	E	58R-4	100–102	872.22	3.32216	-0.653149			161	978	A	23R-5	80-81.5	406.6	3.3035	-0.944
		339	U1389	E	58R-5	0–2	872.72	3.32423	-0.284184			161	978	A	23R-5	100-101.5	406.8	3.30533	-0.334
		339	U1389	E	58R-5	50–52	873.22	3.32631	-0.445169			161	978	A	23R-5	120-122	407	3.30717	-0.66787
		339	U1389	E	58R-5	100–102	873.72	3.32839	-0.0472071			161	978	A	23R-5	140-141.5	407.2	3.309	0.486
		339	U1389	E	58R-6	0–2	874.22	3.33047	-0.344179			161	978	A	23R-6	0-2	407.3	3.30982	0.196
		339	U1389	E	58R-6	50–52	874.72	3.33254	-0.392174			161	978	A	23R-6	40-41.5	407.7	3.31309	0.148
		339	U1389	E	58R-6	100–102	875.22	3.333	-0.632151			161	978	A	23R-6	60-61.5	407.9	3.31473	-0.736
												161	978	A	23R-6	80-81.5	408.1	3.31636	-1.071
								MAX	0.98			161	978	A	23R-6	100-101.5	408.3	3.318	-1.326
								MIN	-1.21709			161	978	A	23R-6	120-121.5	408.5	3.32052	-0.386
								AVERAGE	-0.143688			161	978	A	23R-6	140-141.5	408.7	3.32305	-1.192
								SD	0.366838			161	978	A	23R-7	0-2	408.8	3.32431	-1.336
												161	978	A	23R-7	20-22	409	3.32683	-0.778
												161	978	A	23R-7	40-41.5	409.2	3.32935	-0.125
												161	978	A	24R-1	0-2	409.3	3.33061	-0.497
												161	978	A	23R-7	59-61	409.39	3.33175	0.21
												161	978	A	23R-CC	0-2	409.41	3.332	0.09901
												161	978	A	24R-1	20-23	409.5	3.33343	-0.561
												161	978	A	23R-CC	18-19.5	409.59	3.33487	-0.169
																		MAX	0.677
																		MIN	-1.811
																		AVERAGE	-0.407447
																		SD	0.507746
