# Supplementary material for: Variations in Mediterranean–Atlantic exchange across the late Pliocene climate transition
Source: Copernicus journal article supplement (doi:10.5194/cp-14-339-2018), 2018-03-09
Supplement: Supplementary file 3 [file Supplementary Table 2_revised.xlsx]

## Sheet: Sheet1
SUPPLEMENTARY TABLE 2
Mean and standard deviation of 18O values for the studied glacial and interglacial stages of Intervals I, II and III at IODP Hole U1389E and ODP Hole 978A (Fig. 3).
	Interval III (2.73-2.60 Myrs)	MIS	IODP Hole U1389E					ODP Hole 978A						Interval II (3.02-2.88 Myrs)	MIS	IODP Hole U1389E					ODP Hole 978A						Interval I (3.33-3.27 Myrs)	MIS	IODP Hole U1389E					ODP Hole 978A
			Core-Section	Interval	Depth (mbsf-CSF)	Age (Ma)	d18O (‰ VPDB)	Core-Section	Interval	Depth (mbsf)	Age (Ma)	d18O (‰ VPDB)				Core-Section	Interval	Depth (mbsf-CSF)	Age (Ma)	d18O (‰ VPDB)	Core-Section	Interval	Depth (mbsf)	Age (Ma)	d18O (‰ VPDB)				Core-Section	Interval	Depth (mbsf-CSF)	Age (Ma)	d18O (‰ VPDB)	Core-Section	Interval	Depth (mbsf)	Age (Ma)	d18O (‰ VPDB)
		104	41R-3	75–77	707.35	2.60563	-0.15	17R-2	38-40	344.08	2.60491	0.150859			G14	51R-1	50–52	800	2.88165	0.173541	20R-6	0-2	378.5	2.88357	0.348			M2.2	57R-3	50–52	860.6	3.28199	-0.25456	23R-4	120-122	405.5	3.28027	-0.158
			41R-3	100–102	707.6	2.607	0.7	17R-2	88-90	344.58	2.607	0.539463				51R-1	73–75	800.23	2.88507	0	20R-6	20-22	378.7	2.88729	0.21412				57R-3	100–102	861.1	3.28284	0.0501466	23R-4	140-141.5	405.7	3.28409	0.286
			41R-4	35–37	708.45	2.60773	0.11	17R-2	138-140	345.08	2.60933	0.36268				51R-1	100–102	800.5	2.88823	0.0305286	20R-6	40-41.5	378.9	2.891	0.261				57R-4	0–2	861.63	3.28363	0.0384202	23R-5	0-2	405.8	3.286	0.429
			41R-4	50–52	708.6	2.60786	-0.14	17R-3	38-40	345.58	2.61167	0.314729				51R-1	125–127	800.75	2.89102	0.14	20R-6	60-61.5	379.1	2.89264	0.388				57R-4	50–52	862.13	3.28442	0.0634185
			41R-4	75–77	708.85	2.60807	-0.22														20R-6	80-81.5	379.3	2.89427	0.202				57R-4	100–102	862.63	3.28521	0.0361457
			42R-1	0–2	713.1	2.61171	-0.22														20R-6	100-101.5	379.5	2.89591	0.026				57R-5	0–2	863.13	3.286	0.457392
		Mean					0.0133333					0.341933			Mean					0.0860174					0.239853				57R-5	50–52	863.63	3.288	-0.527542
		St. deviation					0.357752					0.159894			St. deviation					0.0837706					0.127999				57R-5	100–102	864.13	3.29	-0.403883
		G2	43R-3	100–102	726.7	2.636	0.347556	17R-5	138-140	349.58	2.636	0.291481			G15	51R-2	69–71	801.66	2.90368	-0.6	20R-CC	0-2	380	2.9	-1.21244				57R-6	0–2	864.63	3.29201	0.0150061
			43R-4	0–2	727.2	2.63852	-0.06									51R-2	100–102	801.97	2.91002	-0.79	21R-1	0-2	380.6	2.921	-1.363				57R-6	50–52	865.13	3.29401	-0.13796
			43R-4	50–52	727.7	2.64104	0.202544									51R-3	0–2	802.47	2.91335	-0.71	21R-1	20-21.5	380.8	2.923	-0.743			Mean					-0.0663416					0.185667
		Mean					0.16					0.29				51R-3	25–27	802.72	2.92002	-0.664532								St. deviation					0.278886					0.306092
		St. deviation					0.206583									51R-3	75–77	803.22	2.92335	-0.34								M2.2	58R-3	0–2	869.7	3.311	-0.0962024	23R-5	140-141.5	407.2	3.309	0.486
		G3.1	43R-5	78–80	729.48	2.65	-0.444513	17R-6	88-90	350.58	2.648	-0.443492			Mean					-0.62					-1.11				58R-3	50–52	870.2	3.3133	-0.115201	23R-6	0-2	407.3	3.30982	0.196
			44R-1	0–2	732.3	2.65259	-0.34	17R-6	138-140	351.08	2.654	-0.923257			St. deviation					0.171595					0.323379									23R-6	40-41.5	407.7	3.31309	0.148
			44R-1	50–52	732.8	2.65305	-0.14	17R-7	38-40	351.58	2.65991	-0.695553			G16	51R-3	100–102	803.47	2.92668	0.304553	21R-1	40-41.5	381	2.925	-0.254			Mean					-0.11					0.28
			44R-1	100–102	733.3	2.6535	-0.53									51R-3	125–127	803.72	2.93001	0.45	21R-1	60-61.5	381.2	2.927	-0.25			St. deviation					0.0134337					0.18287
			44R-2	0–2	733.84	2.654	0.29									51R-4	0–2	803.97	2.93426	0.29	21R-1	80-81.5	381.4	2.93425	0.06			M3	58R-3	100–102	870.7	3.318	-1.21709	23R-6	60-61.5	407.9	3.31473	-0.736
		Mean					-0.23					-0.69				51R-4	50–52	804.47	2.93622	0.26									58R-4	50–52	871.72	3.32008	-0.43717	23R-6	80-81.5	408.1	3.31636	-1.071
		St. deviation					0.326563					0.239985			Mean					0.33					-0.15				58R-4	100–102	872.22	3.32216	-0.653149	23R-6	100-101.5	408.3	3.318	-1.326
		G3.2	45R-1	23–25	742.13	2.676	-0.57	18R-1	138-140	353.18	2.675	-0.714218			St. deviation					0.0846324					0.180144				58R-5	0–2	872.72	3.32423	-0.284184	23R-6	120-121.5	408.5	3.32052	-0.386
			45R-1	50–52	742.4	2.67671	-0.44	18R-2	38-40	353.68	2.679	-1.1075			G19	51R-7	50–52	808.97	2.96214	-0.77	21R-2	20-22	382.3	2.95981	-1.061				58R-5	50–52	873.22	3.32631	-0.445169	23R-6	140-141.5	408.7	3.32305	-1.192
			45R-1	75–77	742.65	2.67738	-0.17									51R-7	68–70	809.15	2.96502	-0.94	21R-2	40-41.5	382.5	2.96235	-1.466									23R-7	0-2	408.8	3.32431	-1.336
			45R-1	100–102	742.9	2.67804	-0.41									52R-1	25–27	809.35	2.96521	-0.486163	21R-2	60-61.5	382.7	2.96488	-1.636			Mean					-0.607353					-1.01
			45R-1	125–127	743.15	2.6787	-0.04								Mean					-0.73					-1.39			St. deviation					0.365235					0.376138
			45R-2	0–2	743.4	2.67936	-0.62								St. deviation					0.229286					0.295395
		Mean					-0.38					-0.910857			G20	52R-2	0–2	809.37	2.96759	0.0755325	21R-2	80-81.5	382.9	2.96742	-1.176
		St. deviation					0.227046					0.27809				52R-2	25–27	809.62	2.96996	0.36	21R-2	102-103.5	383.12	2.97022	-0.217
		G4	45R-3	100–102	745.91	2.686	0.37	18R-4	138-140	357.68	2.686	0.168917				52R-2	50–52	809.87	2.97073	0.0145272	21R-2	120-122	383.3	2.9725	-0.153
			45R-4	50–52	746.91	2.68928	0.38	18R-5	38-40	358.18	2.6945	0.0327836				52R-2	72–74	810.09	2.97167	0.0275283	21R-2	140-141.5	383.5	2.97504	-0.304
			45R-4	98–100	747.39	2.69022	-0.01									52R-2	100–102	810.37	2.97251	0.64	21R-3	0-2	383.6	2.97631	-0.351
			45R-5	2–4	747.93	2.69128	0.55									52R-2	125–127	810.62	2.97336	-0.2
		Mean					0.32					0.100851				52R-3	0–2	810.87	2.97504	0.57
		St. deviation					0.236555					0.0962612				52R-3	50–52	811.37	2.97588	0.242926
		G5	46R-1	50–52	752	2.70017	-0.4	18R-5	88-90	358.68	2.703	-0.595422				52R-3	75–77	811.62	2.97672	0.13
			46R-1	100–102	752.5	2.70111	-0.14	18R-5	138-140	359.18	2.7045	-0.0973213				52R-3	100–102	811.87	2.97757	0.22
			46R-2	0–2	753	2.70205	0.12	18R-6	38-40	359.68	2.706	-0.49366			Mean					0.21					-0.44
			46R-2	50–52	753.5	2.703	-0.35								St. deviation					0.258679					0.418393
			46R-2	100–102	754	2.70594	-0.09								G21	52R-5	25–27	814.12	2.98599	-0.47	21R-3	80-81.5	384.4	2.98646	-0.884
			46R-3	50–52	755.04	2.70735	-0.4									52R-5	75–77	814.62	2.98778	-0.4	21R-3	100-101.5	384.6	2.989	-1.046
		Mean					-0.21					-0.395468				52R-5	100–102	814.87	2.98958	-0.416088	21R-3	121-122.5	384.81	2.99236	-0.939
		St. deviation					0.209762					0.263168				52R-5	125–127	815.12	2.9916	-0.02	21R-3	140-141.5	385	2.9954	-0.447
		G6	46R-4	100–102	757.04	2.71309	0.47	19R-1	88-90	362.28	2.716	0.245188				52R-6	0–2	815.4	2.9934	-0.413088	21R-4	0-2	385.1	2.997	-0.138
			46R-5	3–5	757.57	2.71442	-0.22									52R-6	25–27	815.65	2.9952	0.01	21R-4	20-22	385.3	2.999	-0.941
			46R-5	50–52	758.04	2.71535	0.06									52R-6	50–52	815.9	2.997	-0.722094	21R-4	40-41.5	385.5	3.001	-0.088
			46R-5	100–102	758.54	2.71594	-0.12									52R-6	75–77	816.15	2.9972	-0.13
			46R-6	0–2	759.04	2.71652	0.04									52R-7	0–2	816.18	2.99892	-0.635092
			46R-6	50–52	759.54	2.71715	0.28									52R-7	25–27	816.43	3.00139	-0.22
			46R-6	103–105	760.07	2.7177	0.21									52R-8	0–2	816.79	3.0031	-0.197083
		Mean					0.1					0.25			Mean					-0.33					-0.64
		St. deviation					0.237116								St. deviation					0.238134					0.407907
		G7	47R-2	4–6	762.64	2.72467	-0.112484	19R-2	38-40	363.28	2.727	-0.657825			G22	52R-8	25–27	817.04	3.005	0.45	21R-4	60-61.5	385.7	3.003	0.501
			47R-2	50–52	763.1	2.727	-0.493517	19R-2	88-90	363.78	2.7288	-0.667948									21R-4	82-83.5	385.92	3.0052	0.154
			47R-2	100–102	763.6	2.72941	-0.18149														21R-4	100-101.5	386.1	3.007	0.1
		Mean					-0.26					-0.66			Mean					0.45					0.25
		St. deviation					0.203023					0.00715786			St. deviation										0.217611
